# Supplementary material for: Non-cognate immunity proteins provide broader defenses against interbacterial effectors in microbial communities
Source: eLife journal article supplement (doi:10.7554/elife.90607), 2023-09-12

The orange thick arrows mark the relevant bands discussed in the text.

-- Knecht\*, Sirias\* et al., *eLife*

C

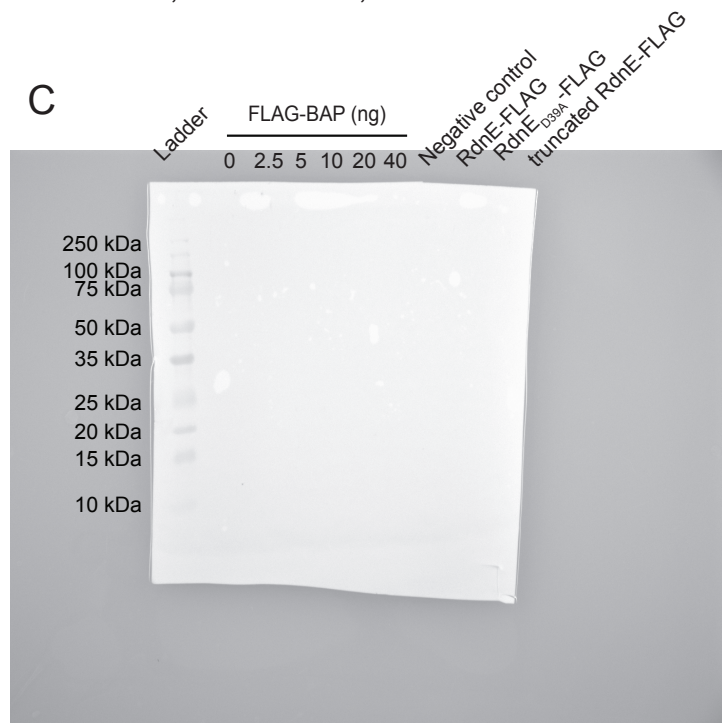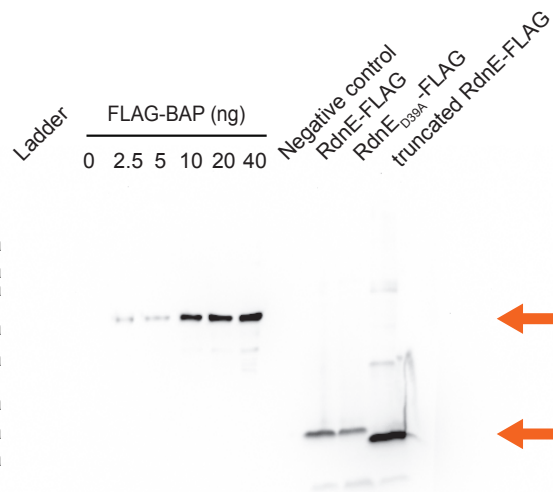

D

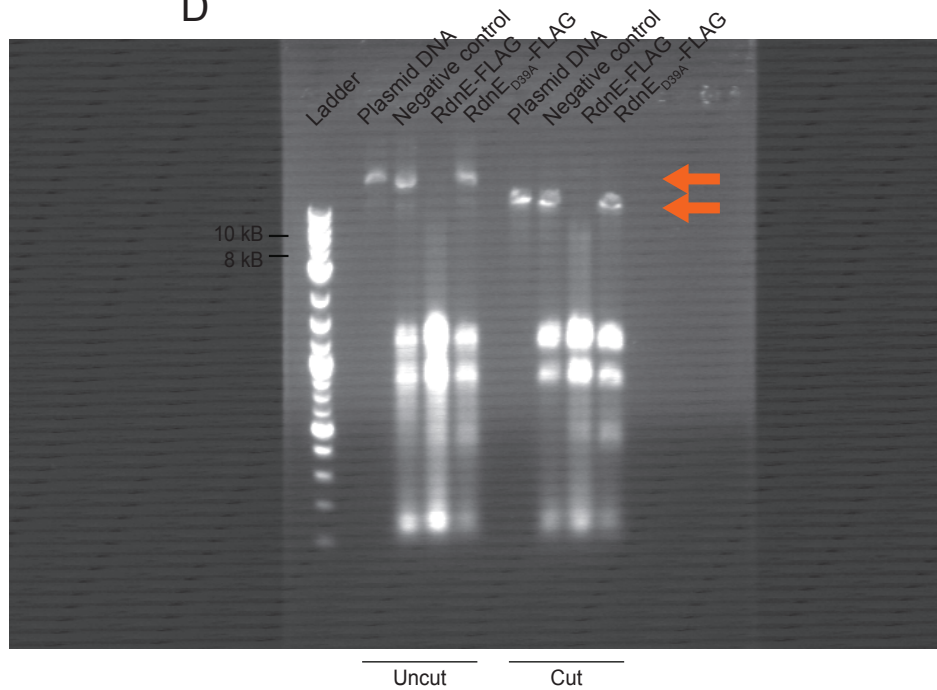

Supplement: fig1-figsupp1-data1 [file Figure 1-figure supplement 1-source data-source data 1.pdf › Figure 1-figure supplement 1-source data-source data 1.pdf]
