# Supplementary material for: Non-cognate immunity proteins provide broader defenses against interbacterial effectors in microbial communities
Source: eLife journal article supplement (doi:10.7554/elife.90607), 2023-09-12

The orange thick arrows mark the relevant bands on the left gel. All visible bands are relevant on the right gel.  
 -- Knecht\*, Sirias\* et al., *eLife*

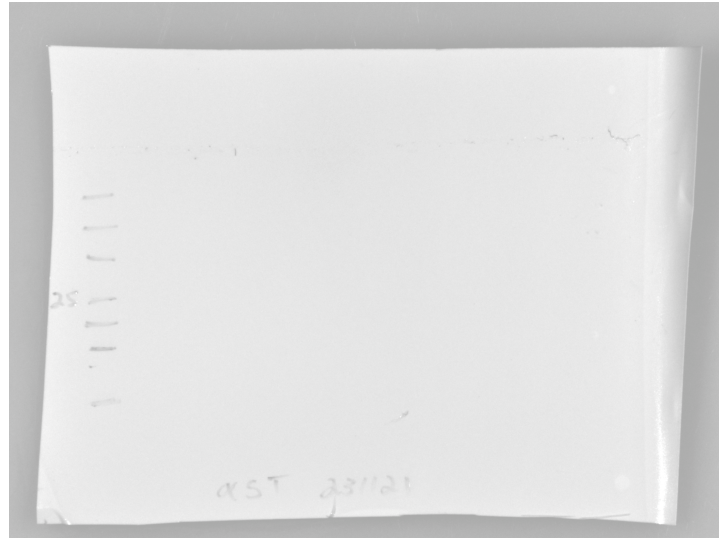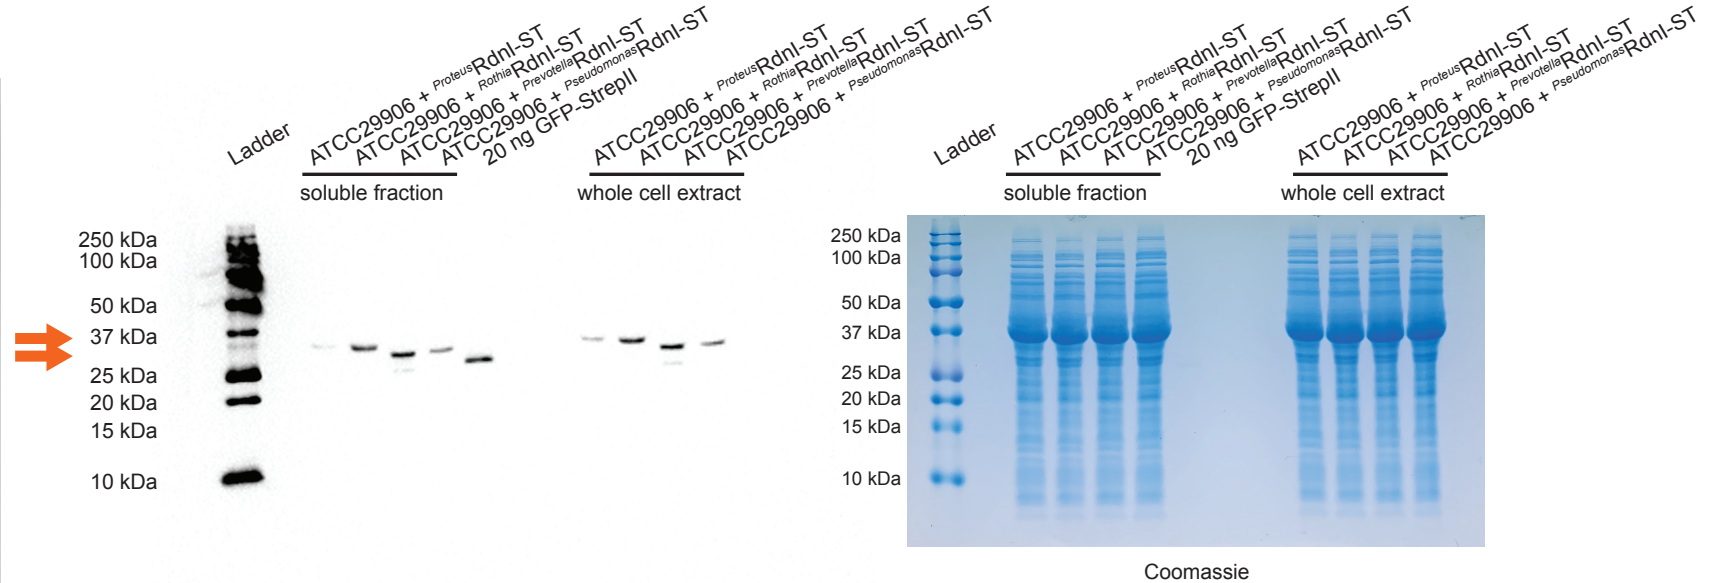

Supplement: fig4-figsupp2-data1 [file Figure 4-figure supplement 2-source data 1.pdf › Figure 4-figure supplement 2-source data 1.pdf]
