# Supplementary figures and images for: Non-cognate immunity proteins provide broader defenses against interbacterial effectors in microbial communities
Source: eLife journal article supplement (doi:10.7554/elife.90607), 2023-09-12

The orange thick arrows mark the relevant bands.

-- Knecht\*, Sirias\* et al., *eLife*

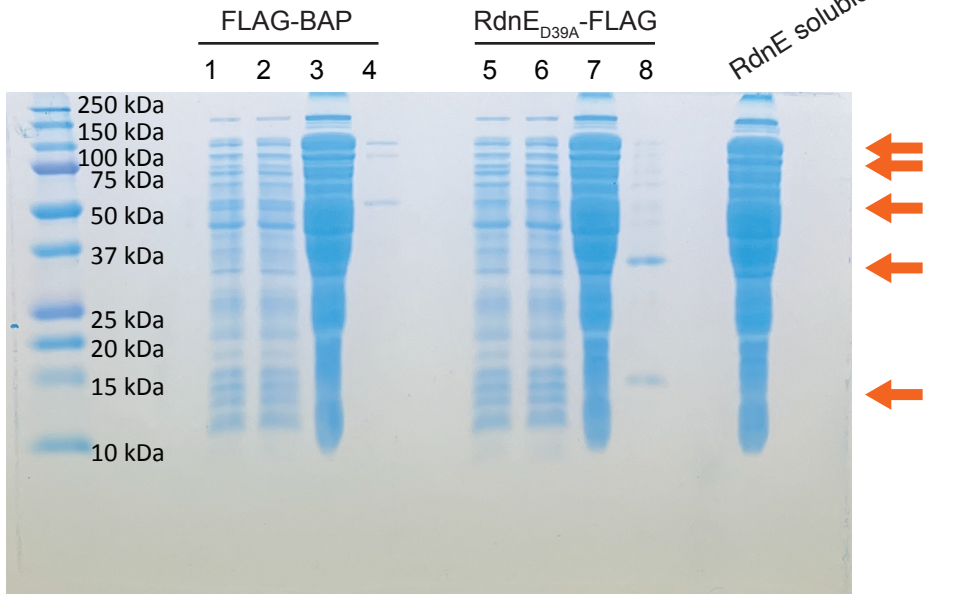

Supplement: fig2-figsupp1-data1 [file Figure 2-figure supplement 1-source data-source data 1.pdf › Figure 2-figure supplement 1-source data-source data 1.pdf]
